# Supplementary material
Source: PubMed Central journal article supplement (PMC6727143)

Figure S1.

## A. Intracerebral Hemorrhage

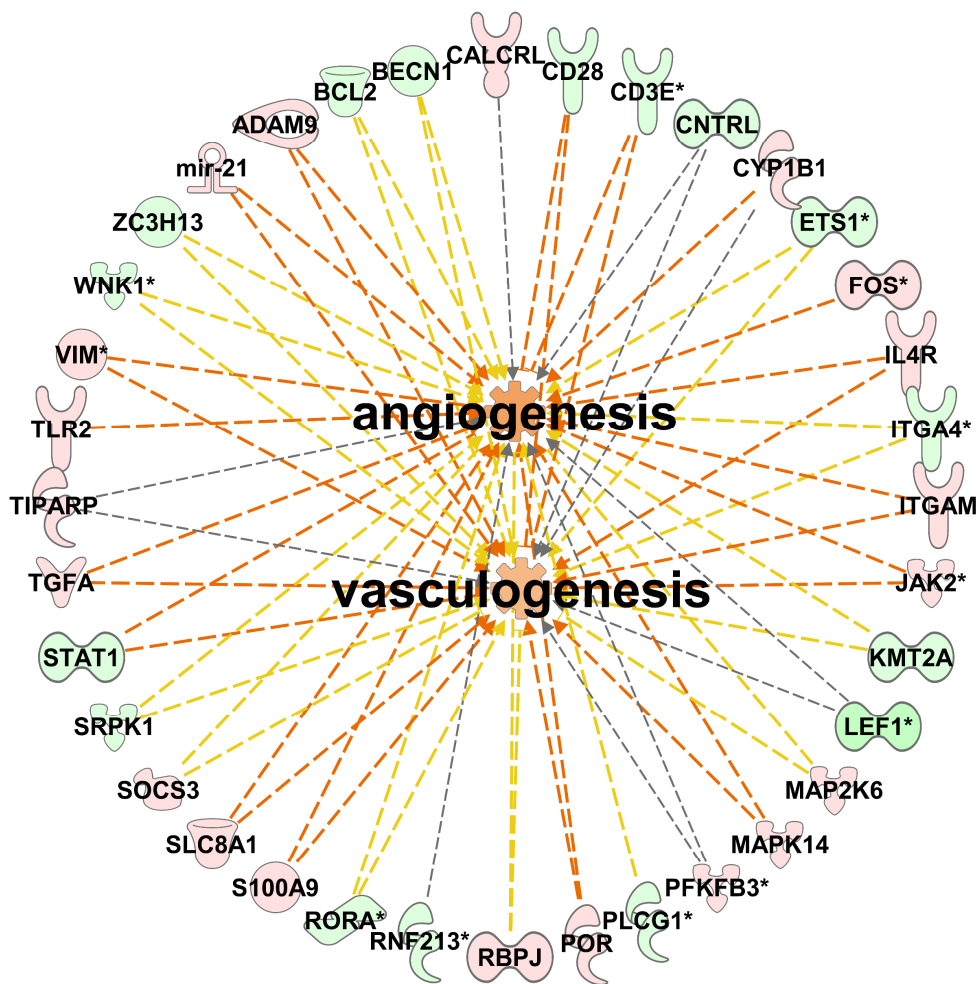

## B. Ischemic Stroke

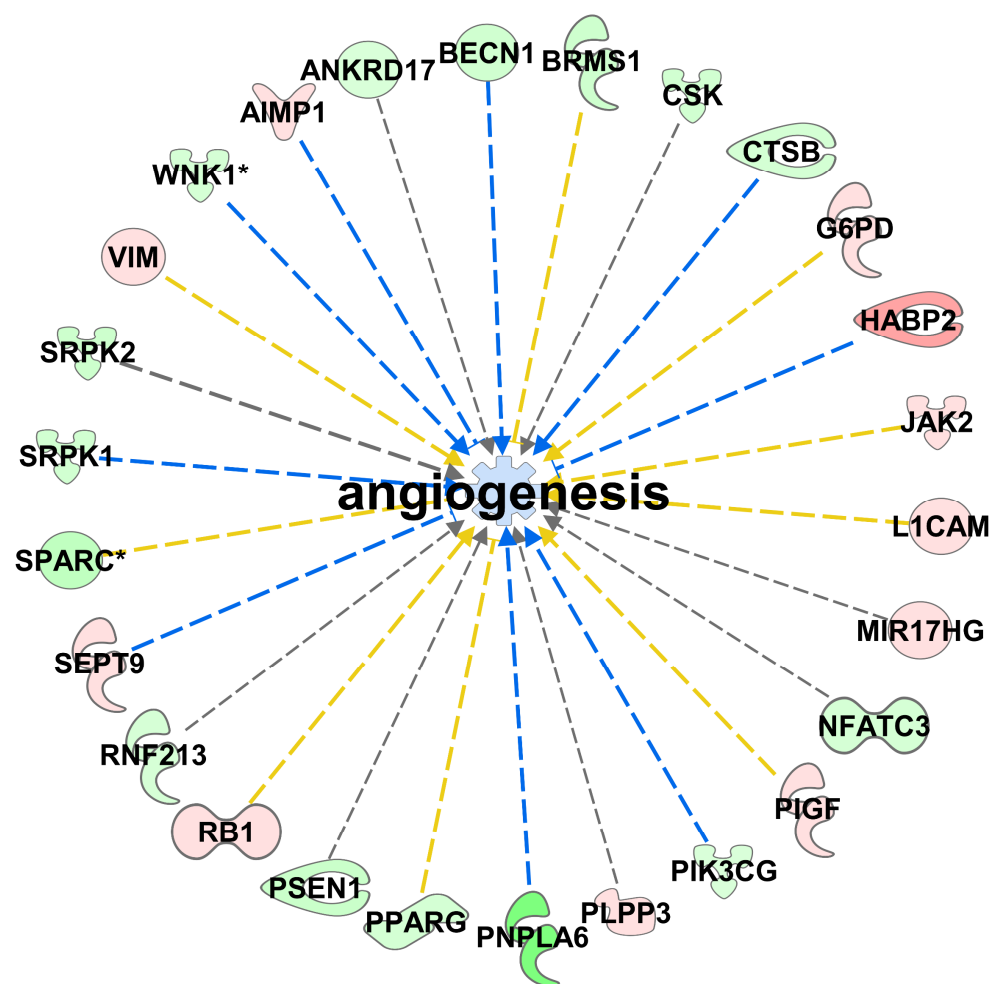

Figure S2.

A. 489 DET in ICH vs. CTRL

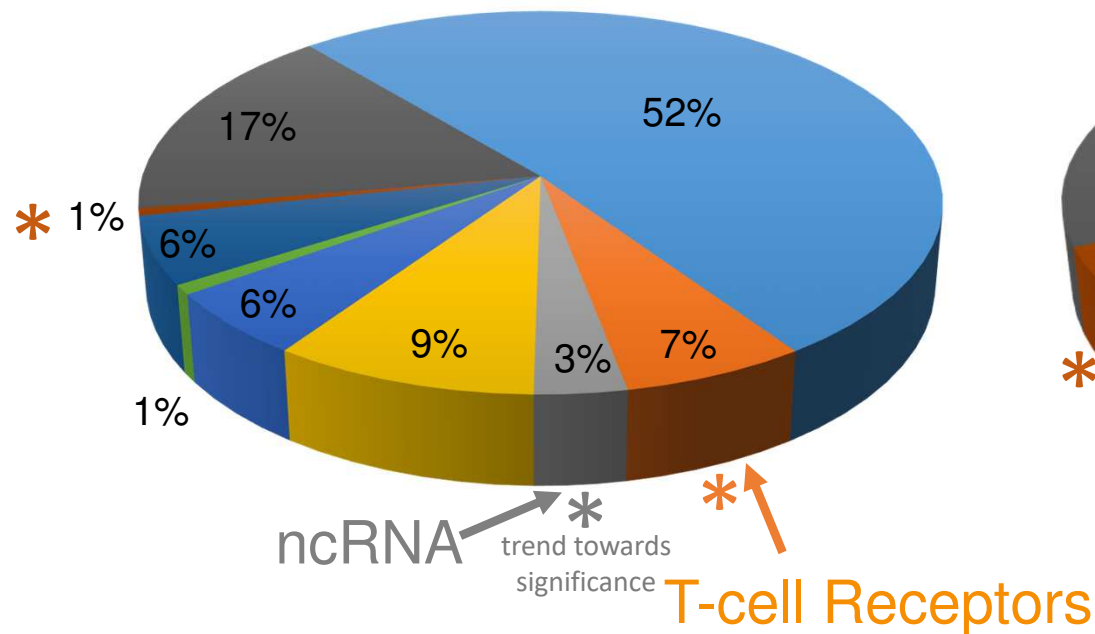

B. 63 DET in IS vs. CTRL

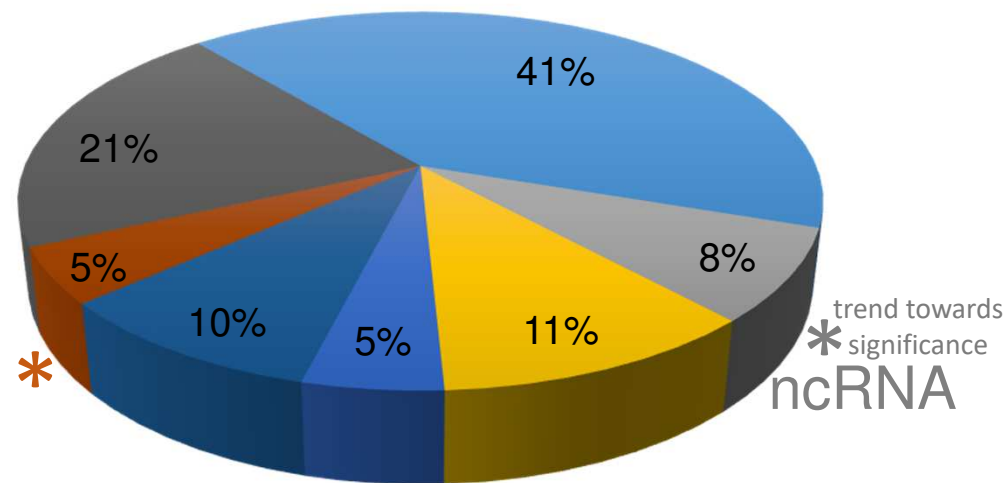

### Biotypes of DET

- |                      |                      |
|----------------------|----------------------|
| protein coding       | antisense            |
| T-cell receptor gene | pseudogene           |
| ncRNA                | not annotated        |
| retained intron      | processed transcript |
| tagged for decay     |                      |

**Figure S3.** Predicted Upstream Regulators of the Observed Transcriptome Changes Following ICH and IS

\* Significant Z-score and significant p-value. Genes highlighted in yellow have p-value  $\leq 0.01$  in ICHvsCTRL and/or ISvsCTRL.

|                           | Activation Z-score |             | p-value   |          | Molecule Type |          |                                                  |
|---------------------------|--------------------|-------------|-----------|----------|---------------|----------|--------------------------------------------------|
|                           | -2.0 to 2.0        |             |           |          |               |          |                                                  |
|                           | ICH vs. CTRL       | IS vs. CTRL | ICHvsCtrl | ISvsCtrl |               |          |                                                  |
| MYC                       | *                  |             | -2.38     | 1.96     | 1.07E-02      | 2.09E-02 | Transcription Regulator                          |
| VHL                       | *                  |             | -2.22     | N/A      | 2.72E-02      | N/A      | Transcription Regulator                          |
| FYN                       | *                  |             | -2.00     | N/A      | 3.54E-02      | N/A      | Kinase                                           |
| IFNB1                     | *                  |             | -2.51     | N/A      | 6.78E-05      | N/A      | Cytokine                                         |
| E2F1                      | *                  |             | -2.42     | N/A      | 1.43E-04      | N/A      | Transcription Regulator                          |
| TGM2                      |                    | *           | 1.26      | -2.24    | 9.06E-04      | ns       | Enzyme                                           |
| PGR                       |                    | *           | 1.46      | -2.00    | 3.66E-03      | ns       | Ligand-Dependant Nuclear Receptor                |
| CST5                      |                    | *           | 1.51      | -2.24    | 1.32E-03      | ns       | Other (Cynstein Protease Inhibitor Activity)     |
| miR-1-3p (w/seed GGAAUGU) |                    | *           | N/A       | -2.43    | N/A           | 3.60E-02 | Mature miRNA                                     |
| PSEN1                     |                    | *           | N/A       | -2.00    | N/A           | 1.46E-02 | Peptidase                                        |
| CEBPD                     |                    | *           | N/A       | -2.19    | N/A           | 1.00E-02 | Transcription Regulator                          |
| CD24                      |                    | *           | N/A       | -2.24    | N/A           | 2.84E-03 | Other (Granulocyte and B cell Signal Transducer) |
| VEGF                      |                    |             | 0.40      | 2.14     | 3.41E-02      | ns       | Growth Factor                                    |
| CCND1                     |                    |             | N/A       | 2.00     | N/A           | ns       | Transcription Regulator                          |
| OSM                       |                    | *           | 3.44      | 2.14     | 2.18E-07      | ns       | Cytokine                                         |
| HGF                       |                    | *           | 2.01      | 2.21     | 6.61E-03      | ns       | Growth Factor                                    |
| IL17A                     |                    | *           | 2.76      | N/A      | 6.66E-03      | N/A      | Cytokine                                         |
| CSF3                      |                    | *           | 2.76      | N/A      | 3.05E-06      | N/A      | Cytokine                                         |
| IL1                       |                    | *           | 2.35      | N/A      | 1.70E-04      | N/A      | Cytokine                                         |
| CAMP                      |                    | *           | 2.41      | N/A      | 1.33E-04      | N/A      | Other (Antibacterial Peptide)                    |
| TGFA                      |                    | *           | 2.16      | N/A      | 4.61E-03      | N/A      | Growth Factor                                    |
| mir-34                    |                    | *           | 2.15      | N/A      | 2.91E-04      | N/A      | miRNA                                            |
| INSR                      |                    | *           | 2.14      | N/A      | 3.33E-03      | N/A      | Kinase                                           |

**Figure S4.**

256 DET in ICH vs. IS

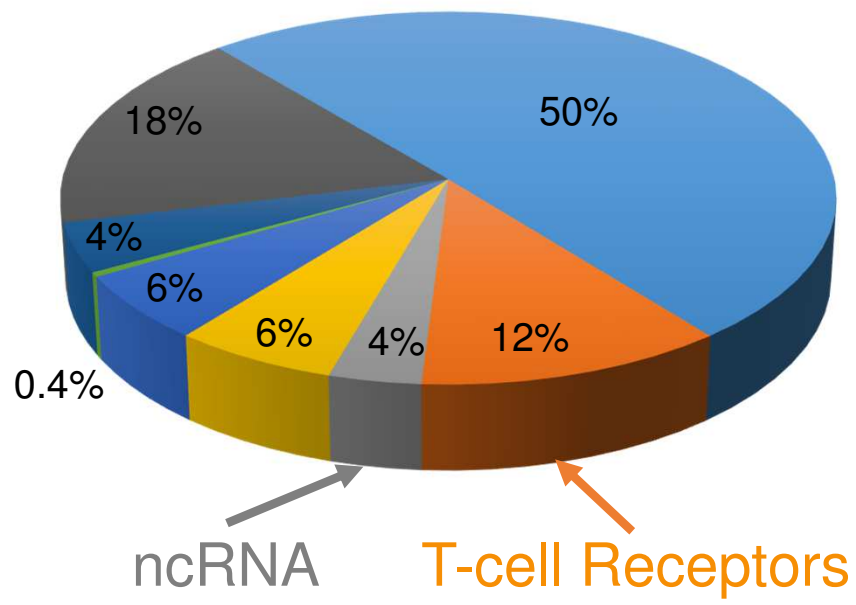

**Biotypes of DET**

- 
- protein coding
  - T-cell receptor gene
  - ncRNA
  - retained intron
  - tagged for decay
  - antisense
  - pseudogene
  - not annotated
  - processed transcript

# Figure S5. Transcriptional Changes in Canonical Pathways (A, top 25 pathways) and in Transcripts from Cell-specific Genes (B) in ICH compared to IS

A.

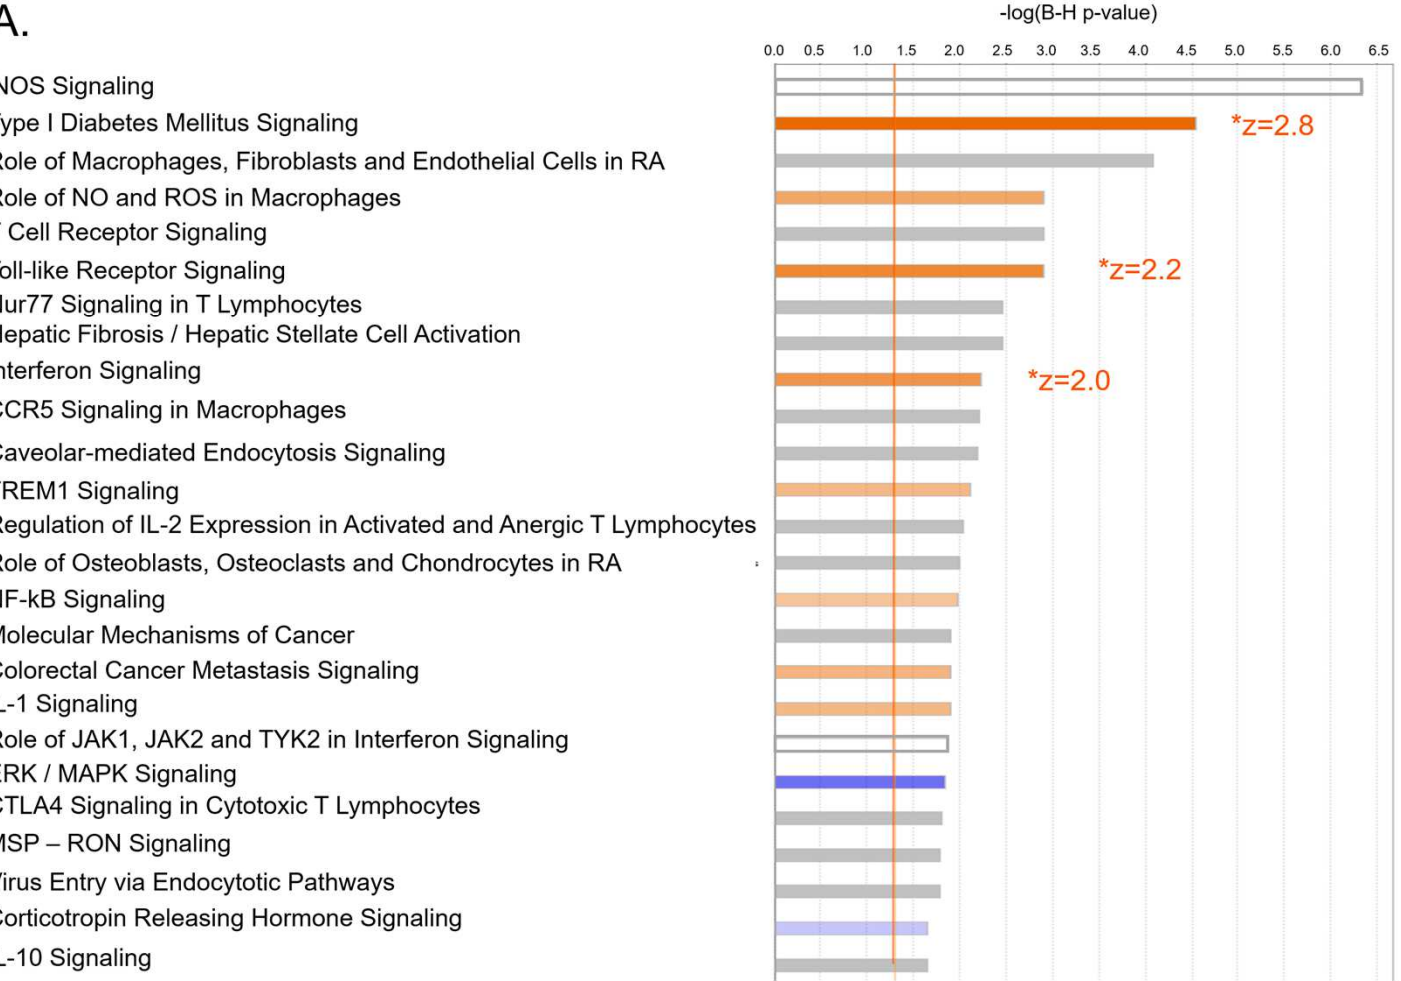

B.

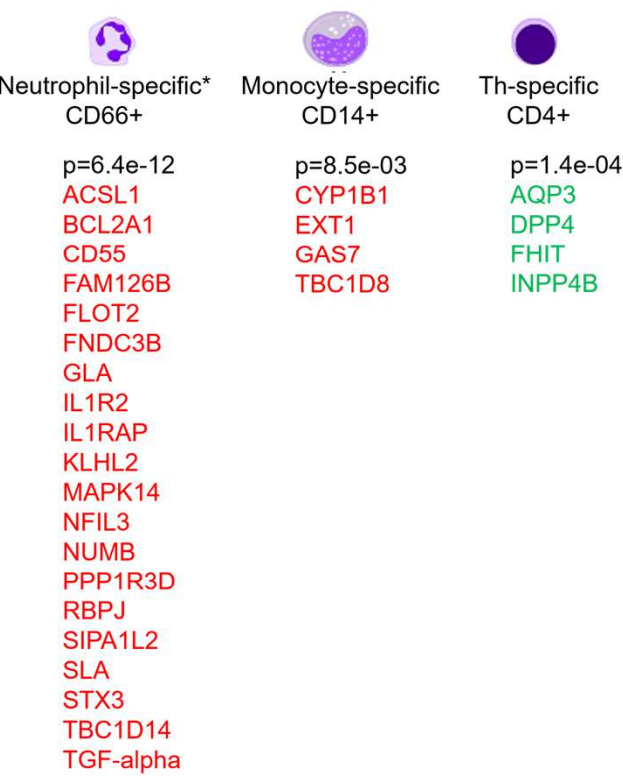

**Figure S6.** Transcriptome Architecture During Day 1 following IS and ICH

**A. Biotype Architecture of DET in the Acute Phase**

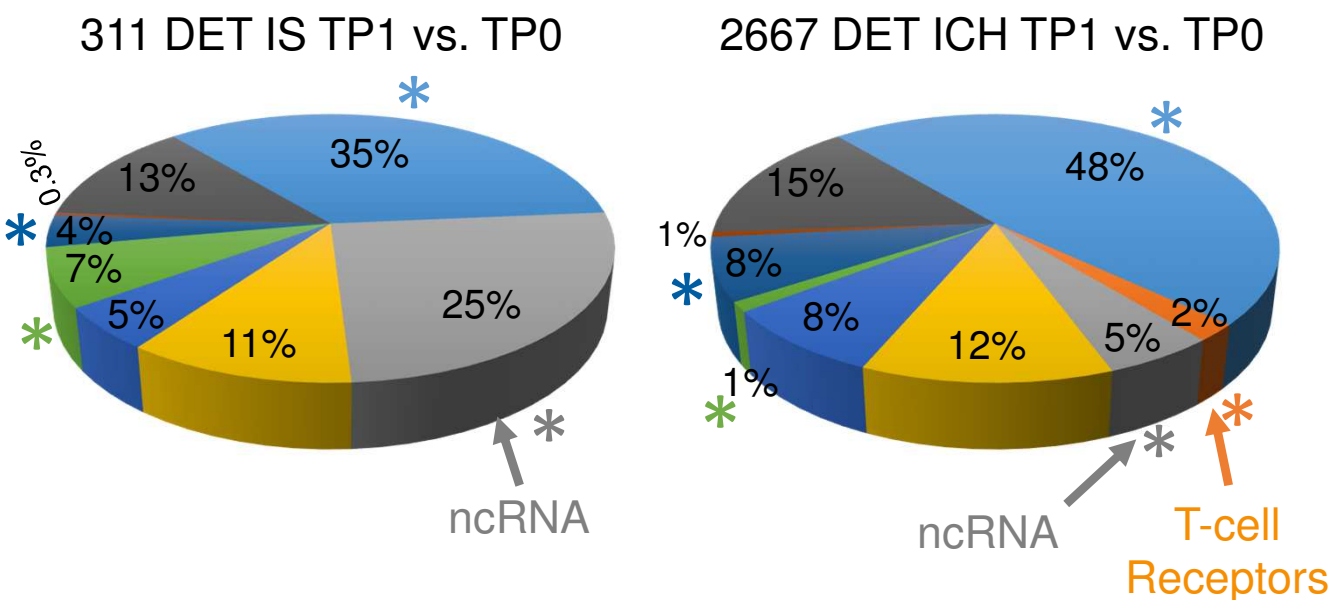

**Biotypes of DET**

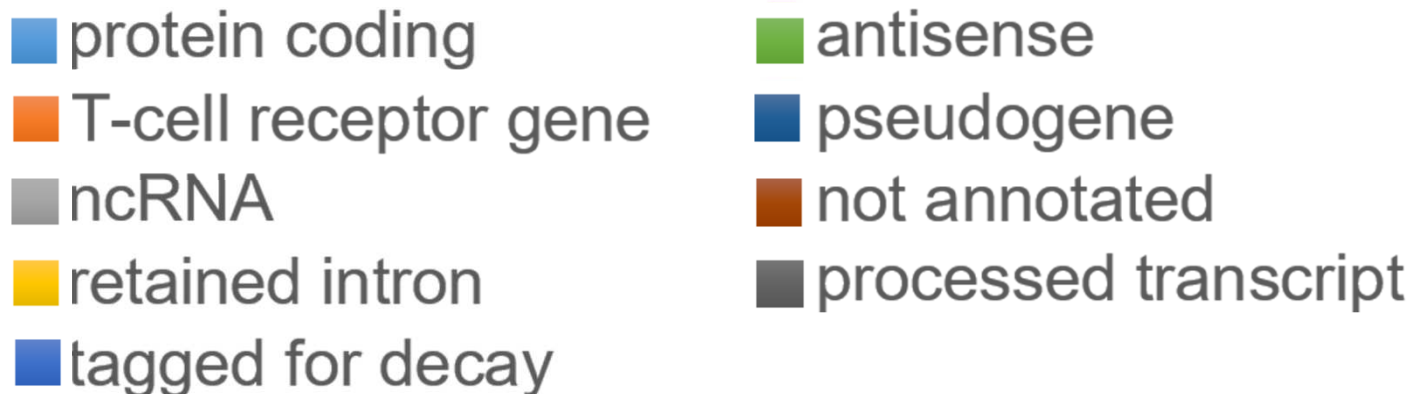

**B. Transcript-Level Overlap**

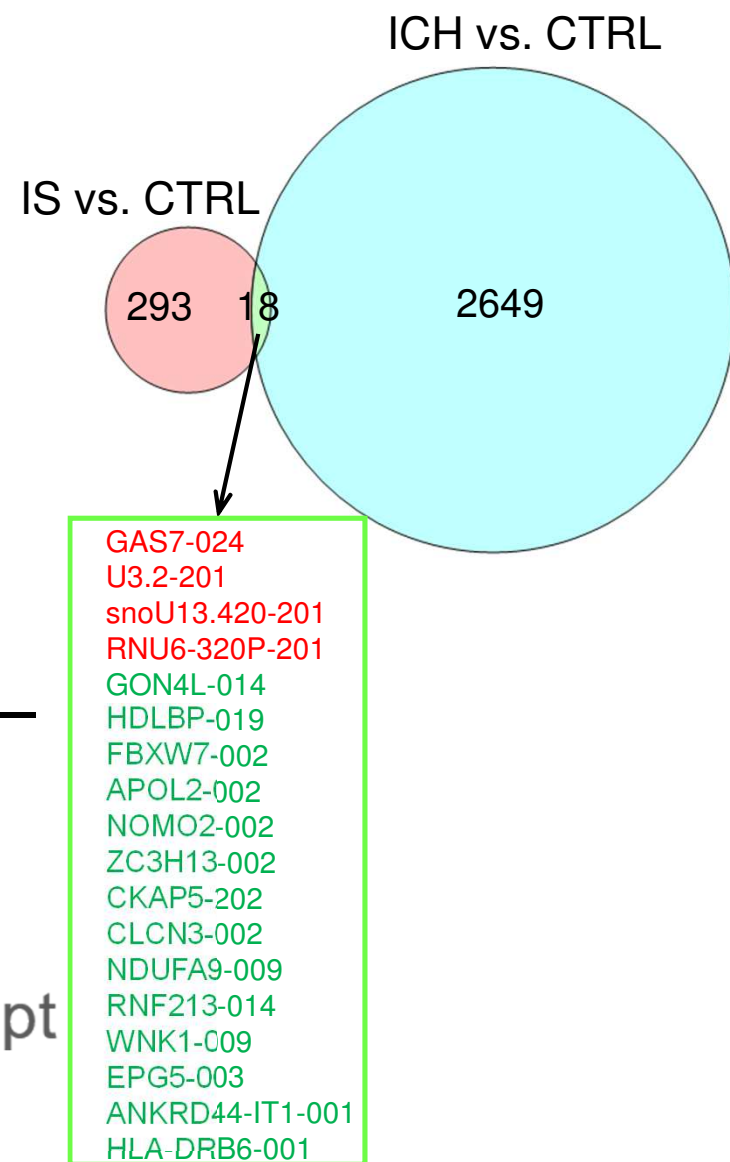

**Figure S7.** Principal Components Analysis on the differentially expressed transcripts (DET) between controls subjects (CTRL, TP0) and: A. Intracerebral Hemorrhage (ICH) patients within 24 hours post-onset (ICH\_TP1), 2667 DET. B. Ischemic Stroke (IS) patients within 24 hours post-onset (IS\_TP1), 311 DET.

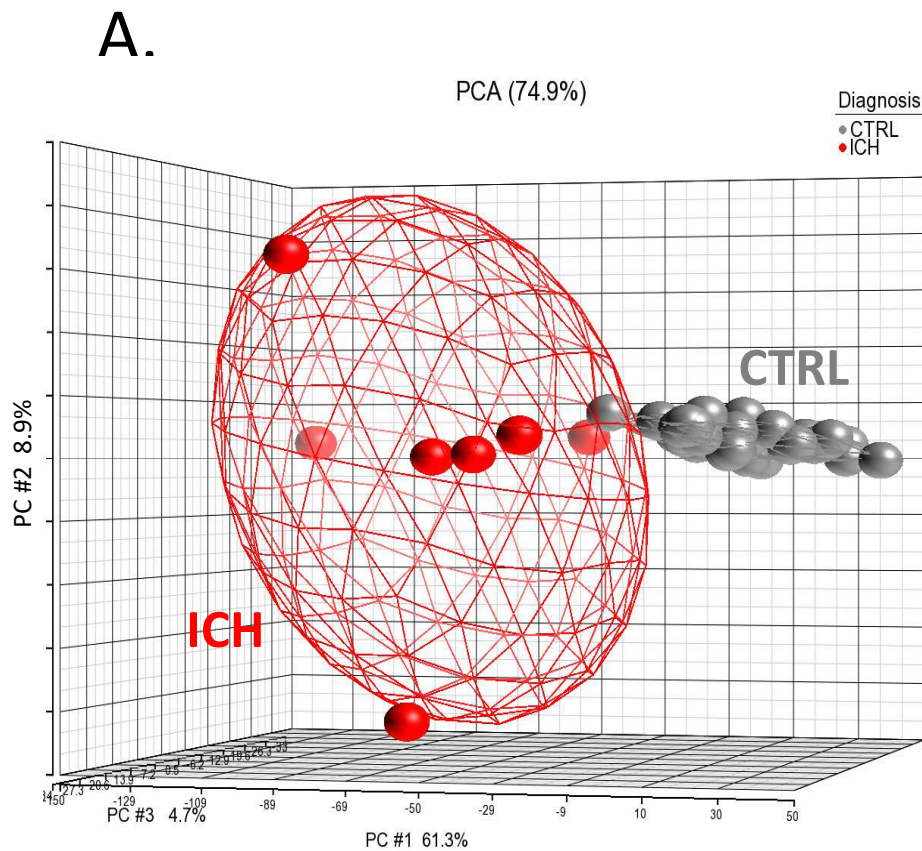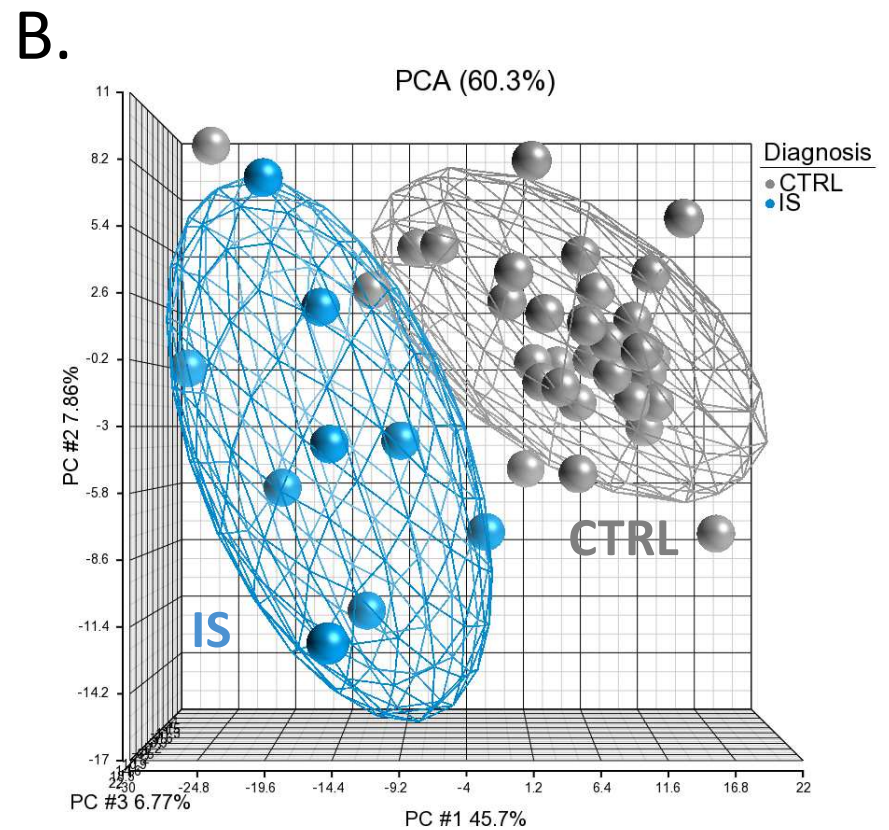

Figure S8.

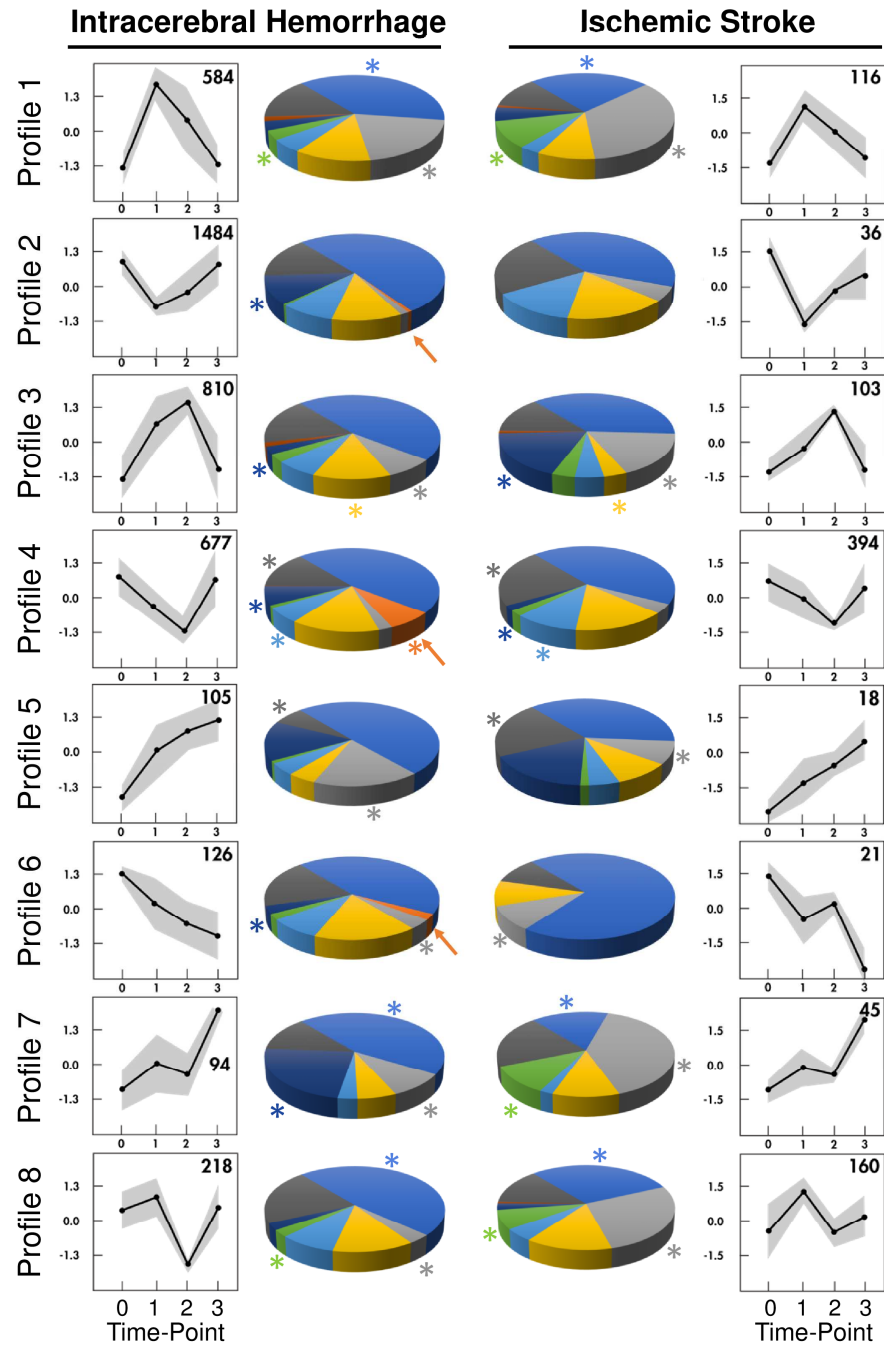



Figure S9. Temporal profiles 9 and 10. A. Profile 9 in ICH only (there was no similar profile in IS). B. Profile 10 – in IS (there was no similar profile in ICH).

## Figure S9A. Profile 9 - ICH

ICH

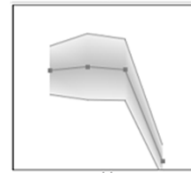

---

### Canonical Pathways

- ATM Signaling
- PEDF Signaling
- Sumoylation Pathway
- Inhibition of Angiogenesis by TSP1 (TP53, THBS1)
- PI3K/AKT Signaling

13

### Biofunctions

- Quantity of Multinucleated Giant Cells
- Quantity of Hematopoietic Progenitor Cells
- Quantity of Blood Cells
- Release of Secretory Granules
- Quantity of Apoptotic Cells

# Figure S9B. Profile 10 - IS

IS

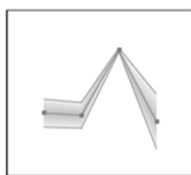

---

## Canonical Pathways

- Protein Ubiquitination Pathway
- EIF2 Signaling
- Heme Degradation (BLVRA)
- Cardiac  $\beta$ -adrenergic Signaling
- Regulation of eIF4 and p70S6K Signaling

19

## Biofunctions

- Anergy of Helper T Lymphocytes
- Conversion of Natural T-regulatory Cells
- Elimination of CD4+ T Lymphocytes
- Fusion of Exocytic Vesicle
- Inhibition of Erythroblasts

**Figure S10.** Principal Components Analysis of 55 DET from T-cell receptor genes can distinguish patients with Intracerebral Hemorrhage (ICH) within 24 hours post-onset from: A. Ischemic Stroke (IS) patients within 24 hours post-onset. B. Control (CTRL) subjects.

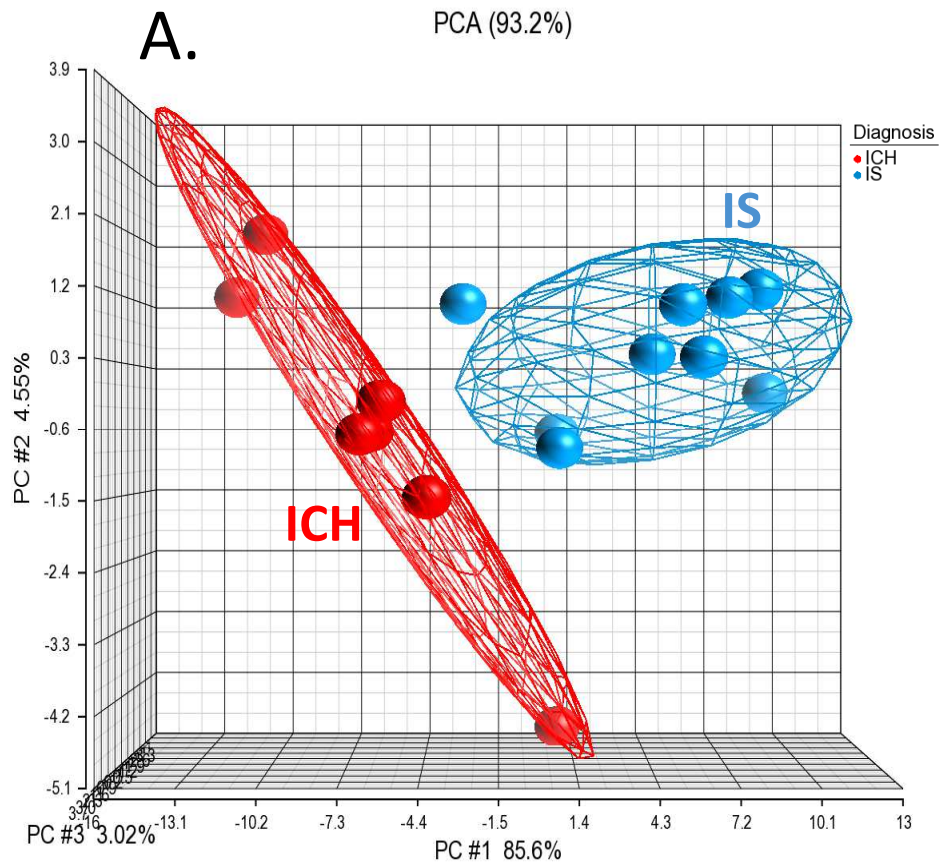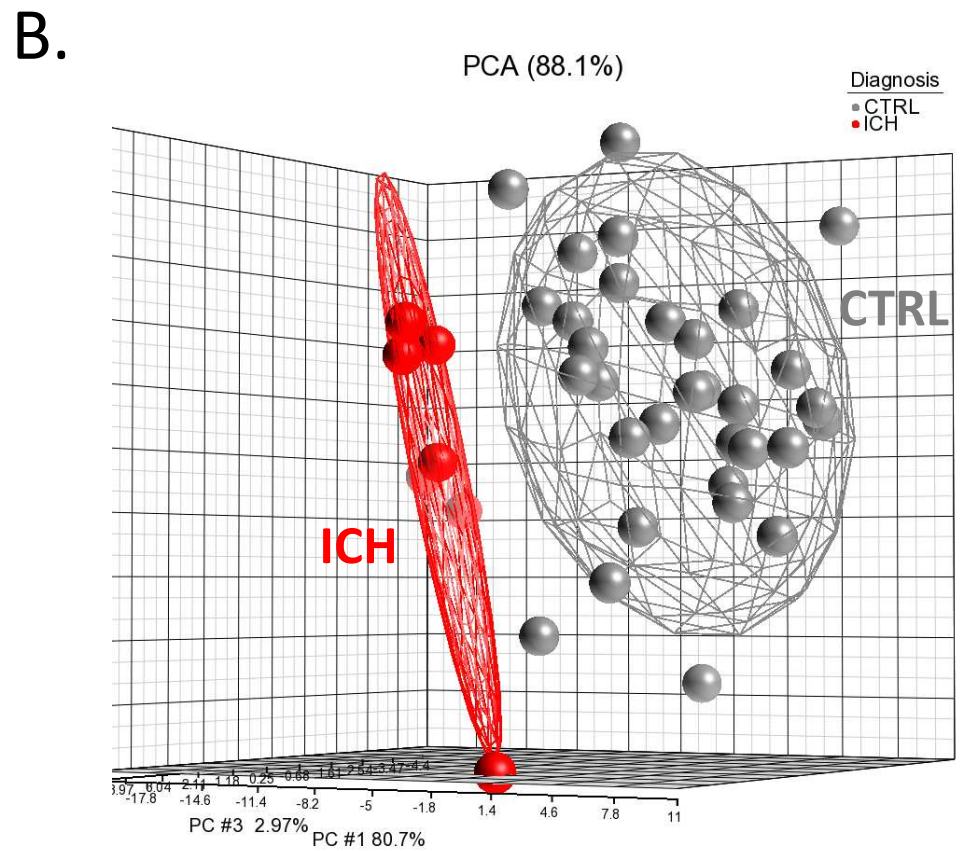

Figure S11. Principal Components Analysis of 107 DET involved in T-cell receptor function can distinguish patients with Intracerebral Hemorrhage (ICH) within 24 hours post-onset from: A. Ischemic Stroke (IS) patients within 24 hours post-onset. B. Control (CTRL) subjects.

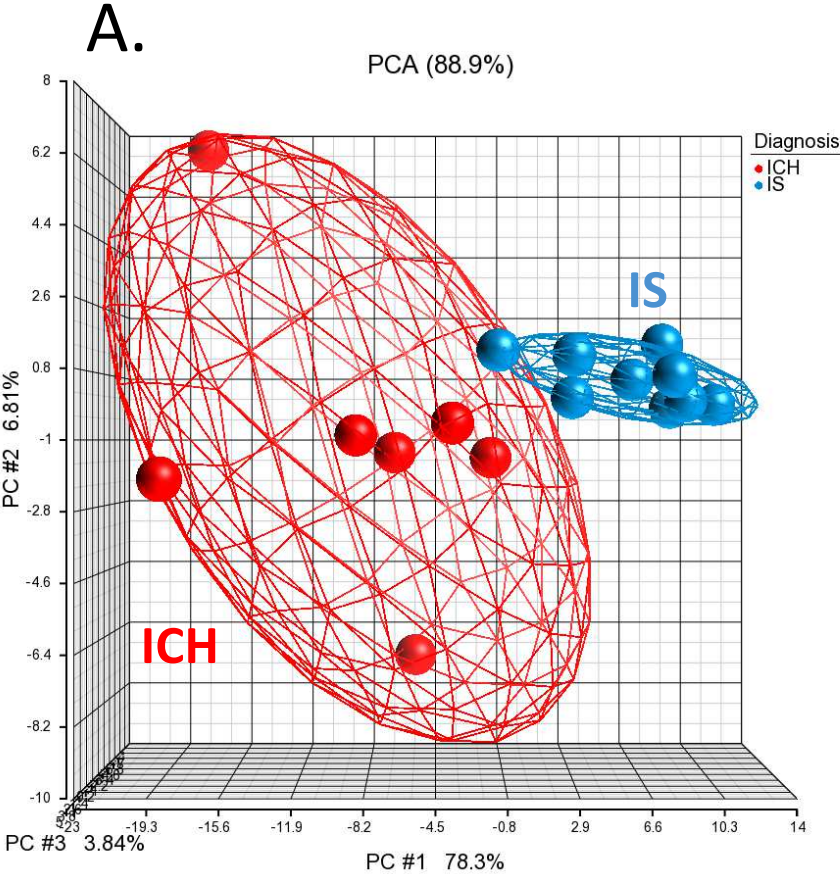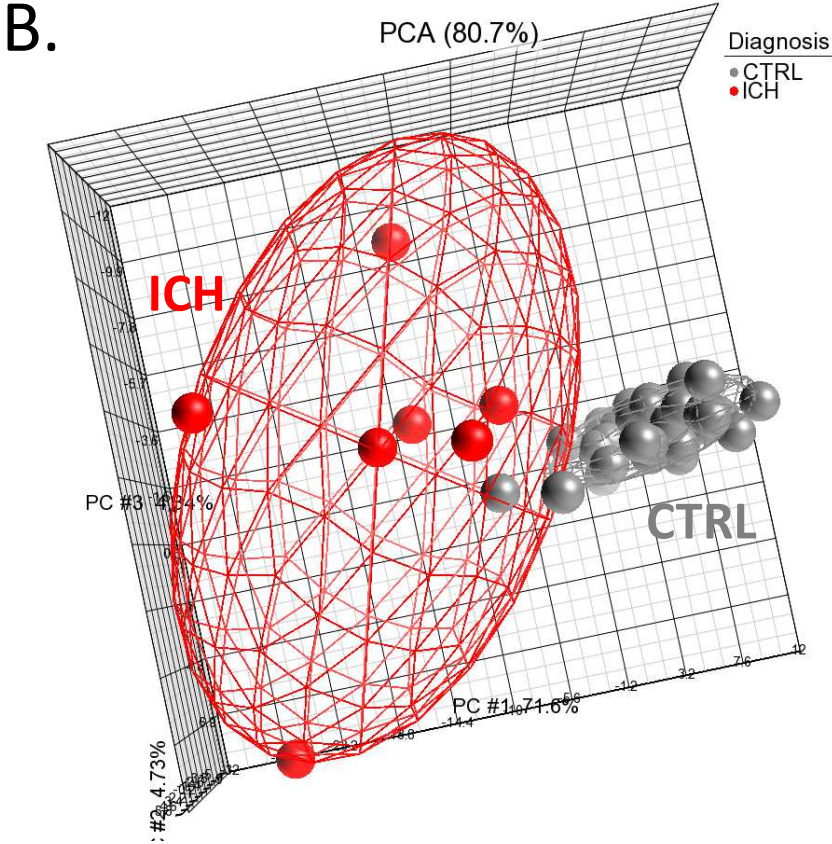

**Figure S12.** Time-Dependent Behavior of the 55 DET from T Cell Receptor Genes, Which Were Differentially Expressed in the Acute Phase (ICH TP1 vs. TP0 (CTRL)).

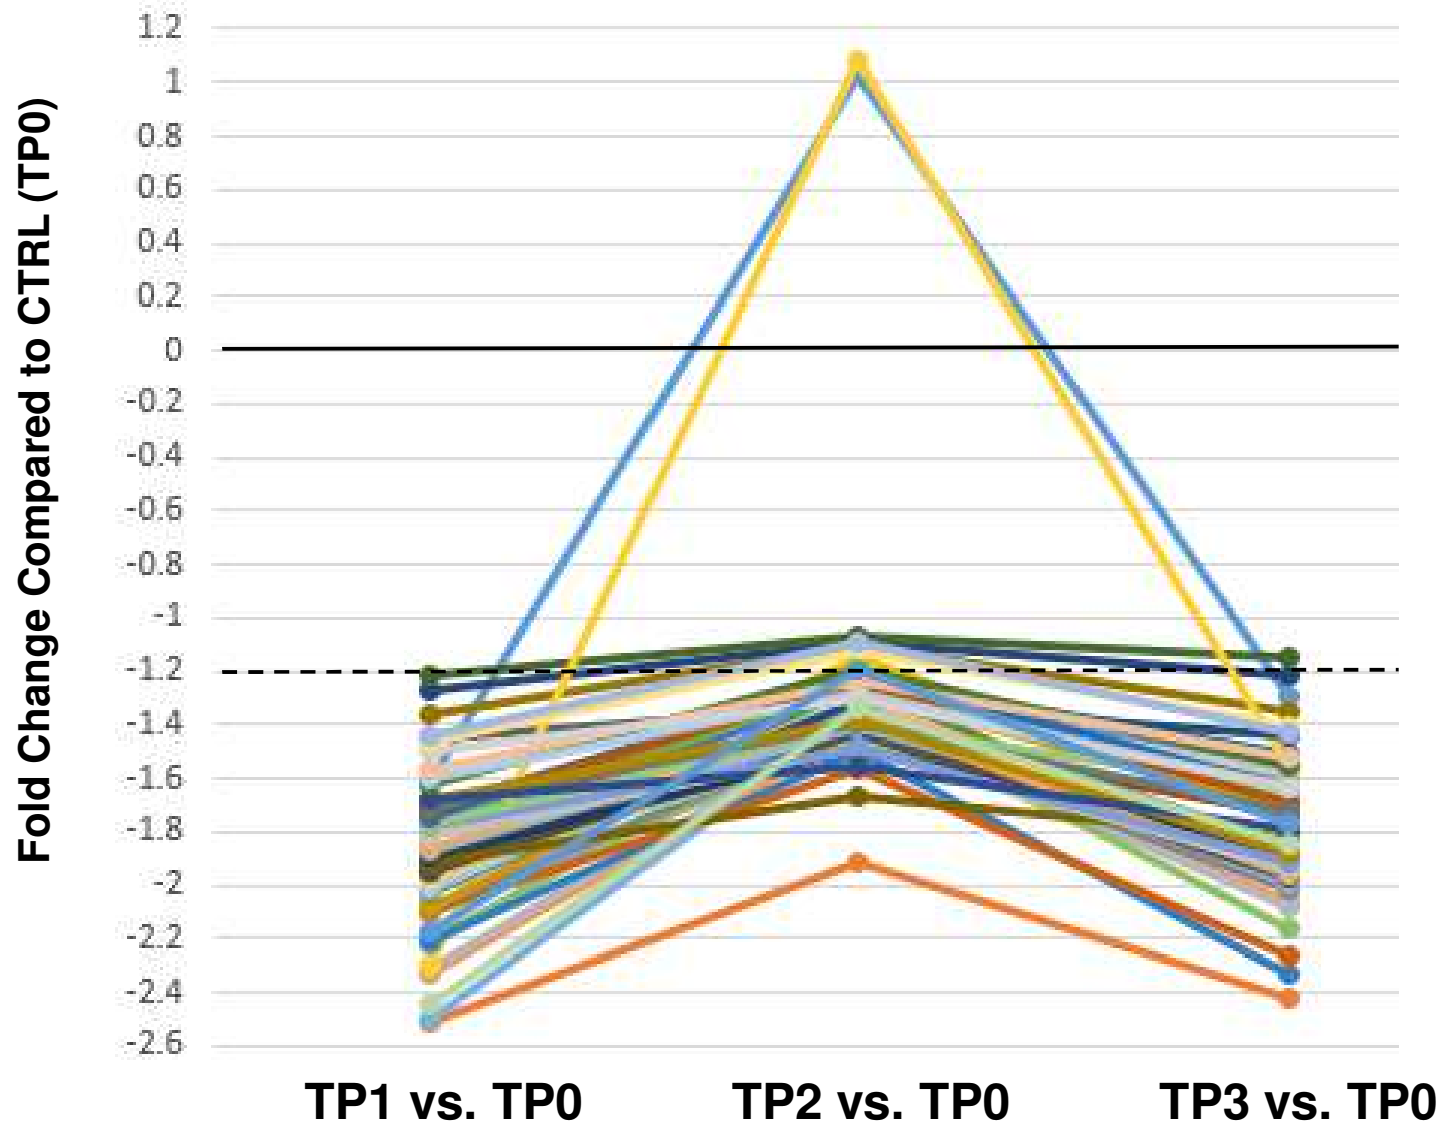

Supplement: Supplementary_Figures_1_to_13.pdf [file Supplementary_Figures_1_to_13.pdf]
